# Supplementary material for: p-Tolylimido rhenium(v) complexes – synthesis, X-ray studies, spectroscopic characterization, DFT calculations and catalytic activity
Source: Royal Society of Chemistry journal article supplement (doi:10.1039/c3dt52528g), 2013-11-22
Supplement: c3dt52528g.pdf [file c3dt52528g.pdf]

## Supplementary materials

**Table S1.** The experimental bond lengths [ $\text{\AA}$ ] and angles [ $^\circ$ ] for **1-6**.

**Table S2.** The comparison of the experimental and optimized bond lengths [ $\text{\AA}$ ] for three DFT method (B3LYP, BP86, PBE1PBE) combined with several basis sets.

**Table S3.** The energy and molar absorption coefficients of experimental absorption bands and the electronic transitions calculated with the TDDFT method for **1**.

**Table S4.** The energy and molar absorption coefficients of experimental absorption bands and the electronic transitions calculated with the TDDFT method for **3**.

**Figure S1.** The experimental and calculated (non-scaled) vibrational spectra of **1** and **3**.

**Figure S2.**  $^1\text{H}$  NMR spectra of **1a** and **3**

**Figure S3.** Difference in the bond distance  $\text{Re-N}_{\text{imido}}$  between calculated values and the crystallographic results obtained by employing B3LYP, BP86, PBE1PBE method for *trans*-(Cl,Cl)-[Re(*p*-NC<sub>6</sub>H<sub>4</sub>CH<sub>3</sub>)Cl<sub>2</sub>(py-2-COO)(PPh<sub>3</sub>)] (a) and *cis*-(Cl,Cl)-[Re(*p*-NC<sub>6</sub>H<sub>4</sub>CH<sub>3</sub>)Cl<sub>2</sub>(py-2-COO)(PPh<sub>3</sub>)] (b).

**Figure S4.** The contours of natural bond orbitals (NBOs) between the rhenium and the *p*-tolylimido ligand for **1** (a) and **3** (b).

**Table S1.** The experimental bond lengths [Å] and angles [°] for **1-6**.

|                 | <b>1a</b> (X = Cl) | <b>1b</b> (X = Cl) | <b>2</b> (X = Br) | <b>3</b> (X = Cl) | <b>4</b> (X = Br) | <b>5</b> (X = Cl) | <b>6</b> (X = Br) |
|-----------------|--------------------|--------------------|-------------------|-------------------|-------------------|-------------------|-------------------|
| Bond lengths    |                    |                    |                   |                   |                   |                   |                   |
| Re(1)-N(2)      | 1.708(6)           | 1.650(17)          | 1.708(11)         | 1.708(4)          | 1.717(3)          | 1.747(3)          | 1.746(4)          |
| Re(1)-O(1)      | 2.035(6)           | 2.027(10)          | 2.076(9)          | 2.072(3)          | 2.057(3)          | 1.915(3)          | 1.900(3)          |
| Re(1)-N(1)      | 2.156(8)           | 2.151(7)           | 2.124(10)         | 2.110(3)          | 2.113(4)          |                   |                   |
| Re(1)-X(1)      | 2.389(2)           | 2.391(3)           | 2.5401(16)        | 2.3571(11)        | 2.5120(6)         | 2.4550(10)        | 2.6052(7)         |
| Re(1)-X(2)      | 2.420(3)           | 2.405(3)           | 2.5497(14)        | 2.3928(12)        | 2.5490(6)         | 2.4006(9)         | 2.5490(7)         |
| Re(1)-P(1)      | 2.433(2)           | 2.450(2)           | 2.450(3)          | 2.4398(11)        | 2.4444(11)        | 2.4936(10)        | 2.5050(13)        |
| Re(1)-P(2)      |                    |                    |                   |                   |                   | 2.4979(11)        | 2.5112(13)        |
| Bond angles     |                    |                    |                   |                   |                   |                   |                   |
| N(2)-Re(1)-O(1) | 172.1(3)           | 172.2(5)           | 172.2(5)          | 168.39(12)        | 168.39(13)        | 172.20(12)        | 171.23(19)        |
| N(2)-Re(1)-N(1) | 100.5(3)           | 96.0(5)            | 96.6(5)           | 96.36(14)         | 94.76(15)         |                   |                   |
| O(1)-Re(1)-N(1) | 75.6(3)            | 76.7(3)            | 75.6(3)           | 75.66(11)         | 75.45(13)         |                   |                   |
| N(2)-Re(1)-X(1) | 101.1(2)           | 98.0(4)            | 94.8(3)           | 98.65(11)         | 99.49(12)         | 89.18(9)          | 87.88(16)         |
| O(1)-Re(1)-X(1) | 85.8(2)            | 84.3(2)            | 84.1(2)           | 90.28(7)          | 90.76(8)          | 83.07(8)          | 84.09 (12)        |

|                  |           |            |           |            |            |           |            |
|------------------|-----------|------------|-----------|------------|------------|-----------|------------|
| N(1)-Re(1)-X(1)  | 88.2(2)   | 85.7(2)    | 86.7(3)   | 163.91(9)  | 165.23(10) |           |            |
| N(2)-Re(1)-X(2)  | 91.3(2)   | 94.6(4)    | 96.5(4)   | 102.73(12) | 98.95(12)  | 101.94(9) | 100.44(16) |
| O(1)-Re(1)-X(2)  | 81.5(2)   | 82.5(2)    | 83.7(2)   | 84.84(8)   | 86.37(8)   | 85.82(8)  | 87.84(12)  |
| N(1)-Re(1)-X(2)  | 84.1(2)   | 86.8(2)    | 84.6(3)   | 82.79(9)   | 83.80(9)   |           |            |
| X(1)-Re(1)-X(2)  | 166.47(9) | 165.95(10) | 166.45(5) | 88.27(4)   | 90.14(2)   | 168.87(4) | 170.79(2)  |
| N(2)-Re(1)-P(1)  | 96.9(2)   | 92.9(5)    | 93.1(4)   | 93.25(12)  | 93.98(12)  | 90.58(10) | 91.21(15)  |
| O(1)-Re(1)-P(1)  | 87.14(18) | 94.3(3)    | 94.6(2)   | 79.37(8)   | 80.80(9)   | 89.23(8)  | 86.73(10)  |
| N(1)-Re(1)-P(1)  | 162.6(2)  | 170.7(2)   | 169.9(3)  | 95.59(9)   | 94.51(10)  |           |            |
| X(1)-Re(1)-P(1)  | 88.53(8)  | 95.72(12)  | 89.82(9)  | 89.33(4)   | 88.38(3)   | 94.93(4)  | 98.60(4)   |
| X(2)-Re(1)-P(1)  | 95.47(10) | 89.83(9)   | 96.98(10) | 164.02(4)  | 167.06(3)  | 85.59(3)  | 85.32(4)   |
| C(25)-N(2)-Re(1) | 167.9(6)  | 171.9(10)  | 173.1(10) | 174.4(3)   | 175.1(3)   |           |            |
| O(1)-Re(1)-P(2)  |           |            |           |            |            | 91.19(8)  | 87.00(10)  |
| N(2)-Re(1)-P(2)  |           |            |           |            |            | 89.44(10) | 96.03(15)  |
| P(1)-Re(1)-P(2)  |           |            |           |            |            | 176.80(3) | 171.45(4)  |
| P(2)-Re(1)-X(2)  |           |            |           |            |            | 91.27(3)  | 88.64(4)   |
| P(2)-Re(1)-X(1)  |           |            |           |            |            | 88.27(4)  | 86.52(4)   |
| C(37)-N(2)-Re(1) |           |            |           |            |            | 161.5(3)  | 161.1(4)   |

**Table S2.** The comparison of the experimental and optimized bond lengths [Å] for three DFT methods (B3LYP, B3LYP<sup>d</sup>, BP86, PBE1PBE) combined with several basis sets.

| 1           |            |        |         |         |         |                    |        |         |         |         |         |         |         |         |
|-------------|------------|--------|---------|---------|---------|--------------------|--------|---------|---------|---------|---------|---------|---------|---------|
| Bond        | X-Ray      | B3LYP  |         |         |         | B3LYP <sup>d</sup> | BP86   |         |         |         | PBE1PBE |         |         |         |
|             |            | LTZ631 | LTZ631+ | LTZ6311 | LDZ631+ | LDZ631+            | LTZ631 | LTZ631+ | LTZ6311 | LDZ631+ | LTZ631  | LTZ631+ | LTZ6311 | LDZ631+ |
| Re(1)-N(1)  | 2.156(8)   | 2.147  | 2.145   | 2.146   | 2.146   | 2.146              | 2.114  | 2.110   | 2.111   | 2.112   | 2.122   | 2.121   | 2.121   | 2.121   |
| Re(1)-N(2)  | 1.708(6)   | 1.720  | 1.719   | 1.720   | 1.720   | 1.714              | 1.741  | 1.739   | 1.739   | 1.739   | 1.707   | 1.707   | 1.707   | 1.706   |
| Re(1)-O(1)  | 2.035(6)   | 2.017  | 2.025   | 2.024   | 2.025   | 2.033              | 2.009  | 2.017   | 2.017   | 2.020   | 2.010   | 2.016   | 2.016   | 2.018   |
| Re(1)-P(1)  | 2.433(2)   | 2.490  | 2.496   | 2.498   | 2.493   | 2.431              | 2.478  | 2.483   | 2.483   | 2.479   | 2.446   | 2.451   | 2.451   | 2.448   |
| Re(1)-Cl(1) | 2.389(2)   | 2.444  | 2.434   | 2.434   | 2.434   | 2.434              | 2.422  | 2.419   | 2.419   | 2.420   | 2.406   | 2.399   | 2.401   | 2.406   |
| Re(1)-Cl(2) | 2.420(3)   | 2.457  | 2.457   | 2.454   | 2.458   | 2.449              | 2.451  | 2.443   | 2.442   | 2.444   | 2.421   | 2.420   | 2.418   | 2.413   |
| 3           |            |        |         |         |         |                    |        |         |         |         |         |         |         |         |
| Bond        | X-Ray      | B3LYP  |         |         |         | B3LYP <sup>d</sup> | BP86   |         |         |         | PBE1PBE |         |         |         |
|             |            | LTZ631 | LTZ631+ | LTZ6311 | LDZ631+ | LDZ631+            | LTZ631 | LTZ631+ | LTZ6311 | LDZ631+ | LTZ631  | LTZ631+ | LTZ6311 | LDZ631+ |
| Re(1)-N(1)  | 2.110(3)   | 2.142  | 2.142   | 2.144   | 2.142   | 2.135              | 2.104  | 2.104   | 2.104   | 2.104   | 2.113   | 2.113   | 2.114   | 2.112   |
| Re(1)-N(2)  | 1.708(4)   | 1.719  | 1.718   | 1.718   | 1.717   | 1.715              | 1.739  | 1.738   | 1.738   | 1.737   | 1.706   | 1.705   | 1.705   | 1.705   |
| Re(1)-O(1)  | 2.072(3)   | 2.041  | 2.049   | 2.049   | 2.051   | 2.058              | 2.033  | 2.040   | 2.040   | 2.042   | 2.035   | 2.040   | 2.039   | 2.042   |
| Re(1)-P(1)  | 2.4398(11) | 2.501  | 2.508   | 2.508   | 2.501   | 2.434              | 2.478  | 2.483   | 2.483   | 2.478   | 2.449   | 2.454   | 2.453   | 2.449   |
| Re(1)-Cl(1) | 2.3928(12) | 2.417  | 2.410   | 2.409   | 2.413   | 2.409              | 2.404  | 2.395   | 2.396   | 2.399   | 2.382   | 2.377   | 2.377   | 2.379   |
| Re(1)-Cl(2) | 2.3571(11) | 2.389  | 2.386   | 2.386   | 2.387   | 2.385              | 2.382  | 2.378   | 2.378   | 2.379   | 2.360   | 2.358   | 2.398   | 2.358   |

B3LYP<sup>d</sup> - B3LYP functional improved by adding dispersion correction

**Table S3.** The energy and molar absorption coefficients of experimental absorption bands and the electronic transitions calculated with the TDDFT method for **1**.

| The most important orbital excitations | Character                                                                                    | $\lambda$ [nm] | E[eV] | $f \times 10^2$ | Experimental $\Lambda$ [nm](E[eV]) $\epsilon$ |
|----------------------------------------|----------------------------------------------------------------------------------------------|----------------|-------|-----------------|-----------------------------------------------|
| H→L                                    | d/ $\pi$ (Cl) → $\pi^*$ (p-tol)/d                                                            | 712.1          | 1.74  | 0.04            | 791.2 (1.57) 130                              |
| H→L+1                                  | d/ $\pi$ (Cl) → $\pi^*$ (py-2-COO)/d/ $\pi^*$ (p-tol)                                        | 606.9          | 2.04  | 0.76            | 602.4 (2.06) 200                              |
| H→L+2                                  | d/ $\pi$ (Cl) → $\pi^*$ (py-2-COO)/d/ $\pi^*$ (p-tol)                                        | 412.6          | 3.00  | 8.83            | 425.6 (2.91) 7400                             |
| H-8→L                                  | $\pi$ (PPh <sub>3</sub> )/ $\pi$ (p-tol)/ $\pi$ (Cl) → $\pi^*$ (p-tol)/d                     | 330.2          | 3.76  | 13.20           | 333.2 (3.72) 43 220                           |
| H-2→L                                  | $\pi$ (PPh <sub>3</sub> )/ $\pi$ (p-tol) → $\pi^*$ (p-tol)/d                                 | 320.0          | 3.87  | 26.50           |                                               |
| H-8→L+1                                | $\pi$ (PPh <sub>3</sub> )/ $\pi$ (p-tol)/ $\pi$ (Cl) → $\pi^*$ (py-2-COO)/d/ $\pi^*$ (p-tol) | 282.5          | 4.39  | 3.24            | 266.8 (4.65) 44 100                           |
| H-8→L+2                                | $\pi$ (PPh <sub>3</sub> )/ $\pi$ (p-tol)/ $\pi$ (Cl) → $\pi^*$ (py-2-COO)/d/ $\pi^*$ (p-tol) | 249.5          | 4.97  | 7.88            | 224.8 (5.52) 76 800                           |
| H-5→L+2                                | $\pi$ (PPh <sub>3</sub> )/ $\pi$ (Cl) → $\pi^*$ (py-2-COO)/d/ $\pi^*$ (p-tol)                | 239.6          | 5.17  | 6.48            |                                               |
| H-15→L+1                               | $\pi$ (py-2-COO)/ $\pi$ (Cl)/d → $\pi^*$ (py-2-COO)/d/ $\pi^*$ (p-tol)                       | 236.6          | 5.24  | 6.01            |                                               |

**Table S4.** The energy and molar absorption coefficients of experimental absorption bands and the electronic transitions calculated with the TDDFT method for **3**.

| The most important orbital excitations | Character                                                                                                        | $\lambda$ [nm] | E[eV] | $f \times 10^2$ | Experimental $\Lambda$ [nm](E[eV]) $\epsilon$ |
|----------------------------------------|------------------------------------------------------------------------------------------------------------------|----------------|-------|-----------------|-----------------------------------------------|
| H→L                                    | $d/\pi(\text{Cl})/\pi(\text{py-2-COO}) \rightarrow \pi^*(\text{p-tol})/d/\pi^*(\text{py-2-COO})$                 | 654.9          | 1.89  | 0.19            | 763.6 (1.62) 155                              |
| H→L+1                                  | $d/\pi(\text{Cl})/\pi(\text{py-2-COO}) \rightarrow \pi^*(\text{py-2-COO})/d/\pi^*(\text{p-tol})$                 | 564.4          | 2.20  | 0.33            | 617.6 (2.01) 190                              |
| H→L+2                                  | $d/\pi(\text{Cl})/\pi(\text{py-2-COO}) \rightarrow \pi^*(\text{py-2-COO})/d/\pi^*(\text{p-tol})$                 | 397.5          | 3.12  | 0.13            | 418.0 (2.97) 3 200                            |
| H-1→L                                  | $\pi(\text{p-tol})/d/\pi(\text{Cl}) \rightarrow \pi^*(\text{p-tol})/d/\pi^*(\text{py-2-COO})$                    | 354.5          | 3.50  | 9.13            | 333.6 (3.72) 24 500                           |
| H-1→L                                  | $\pi(\text{p-tol})/d/\pi(\text{Cl}) \rightarrow \pi^*(\text{p-tol})/d/\pi^*(\text{py-2-COO})$                    | 321.4          | 3.86  | 35.04           |                                               |
| H-11→L                                 | $\pi(\text{py-2-COO})/\pi(\text{Cl}) \rightarrow \pi^*(\text{p-tol})/d/\pi^*(\text{py-2-COO})$                   | 256.7          | 4.83  | 3.58            | 260.4 (4.77) 22 270                           |
| H-1→L+8                                | $\pi(\text{p-tol})/d/\pi(\text{Cl}) \rightarrow \pi^*(\text{p-tol})$                                             | 223.1          | 5.56  | 10.24           | 223.6 (5.54) 69 420                           |
| H-15→L+1                               | $\pi(\text{Cl})/\pi(\text{py-2-COO})/\pi(\text{p-tol}) \rightarrow \pi^*(\text{py-2-COO})/d/\pi^*(\text{p-tol})$ | 219.3          | 5.65  | 8.75            |                                               |

## Figures

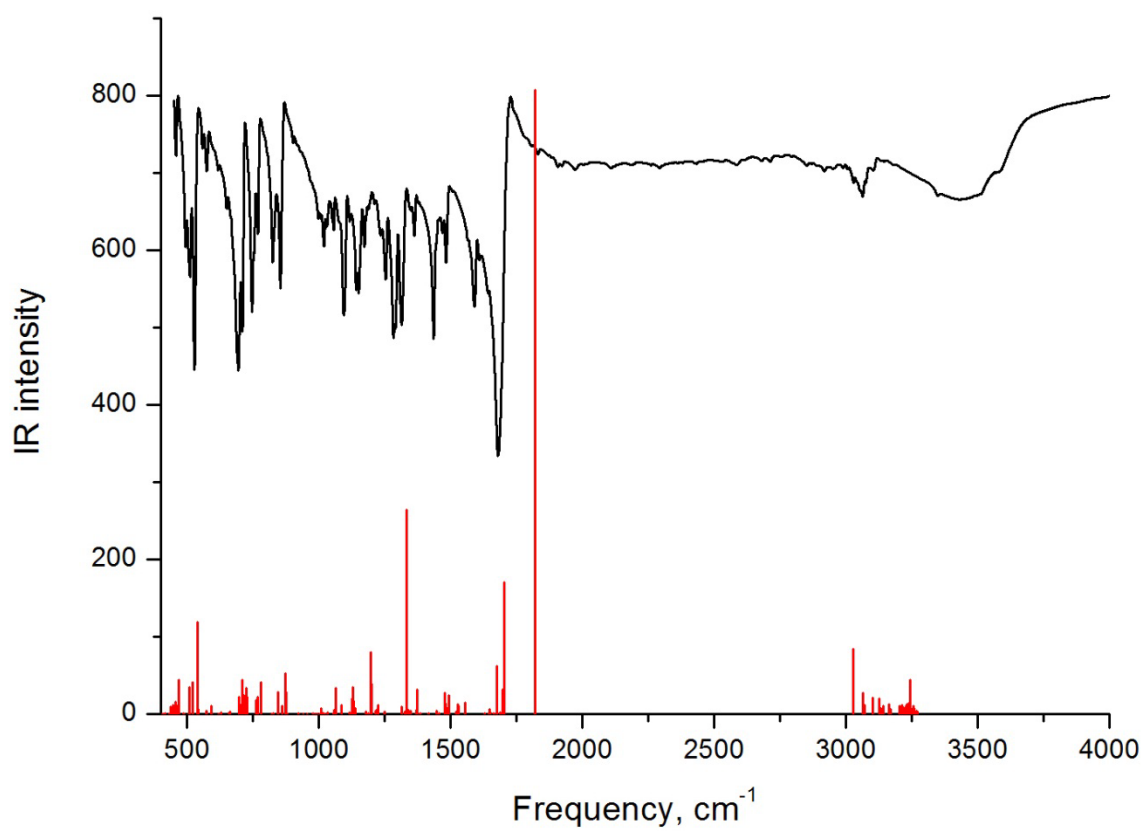

a)

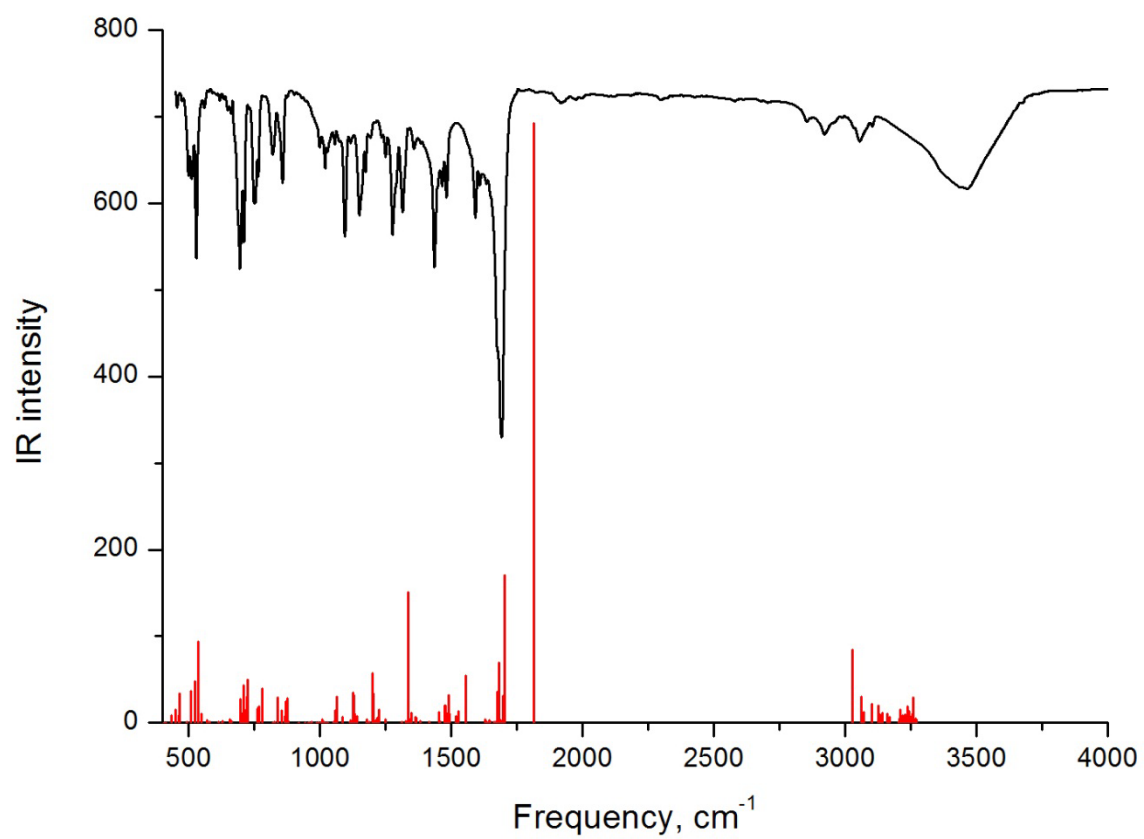



**b)**

**Figure S1.** The experimental and calculated (non-scaled) vibrational spectra of **1a** (a) and **3** (b).

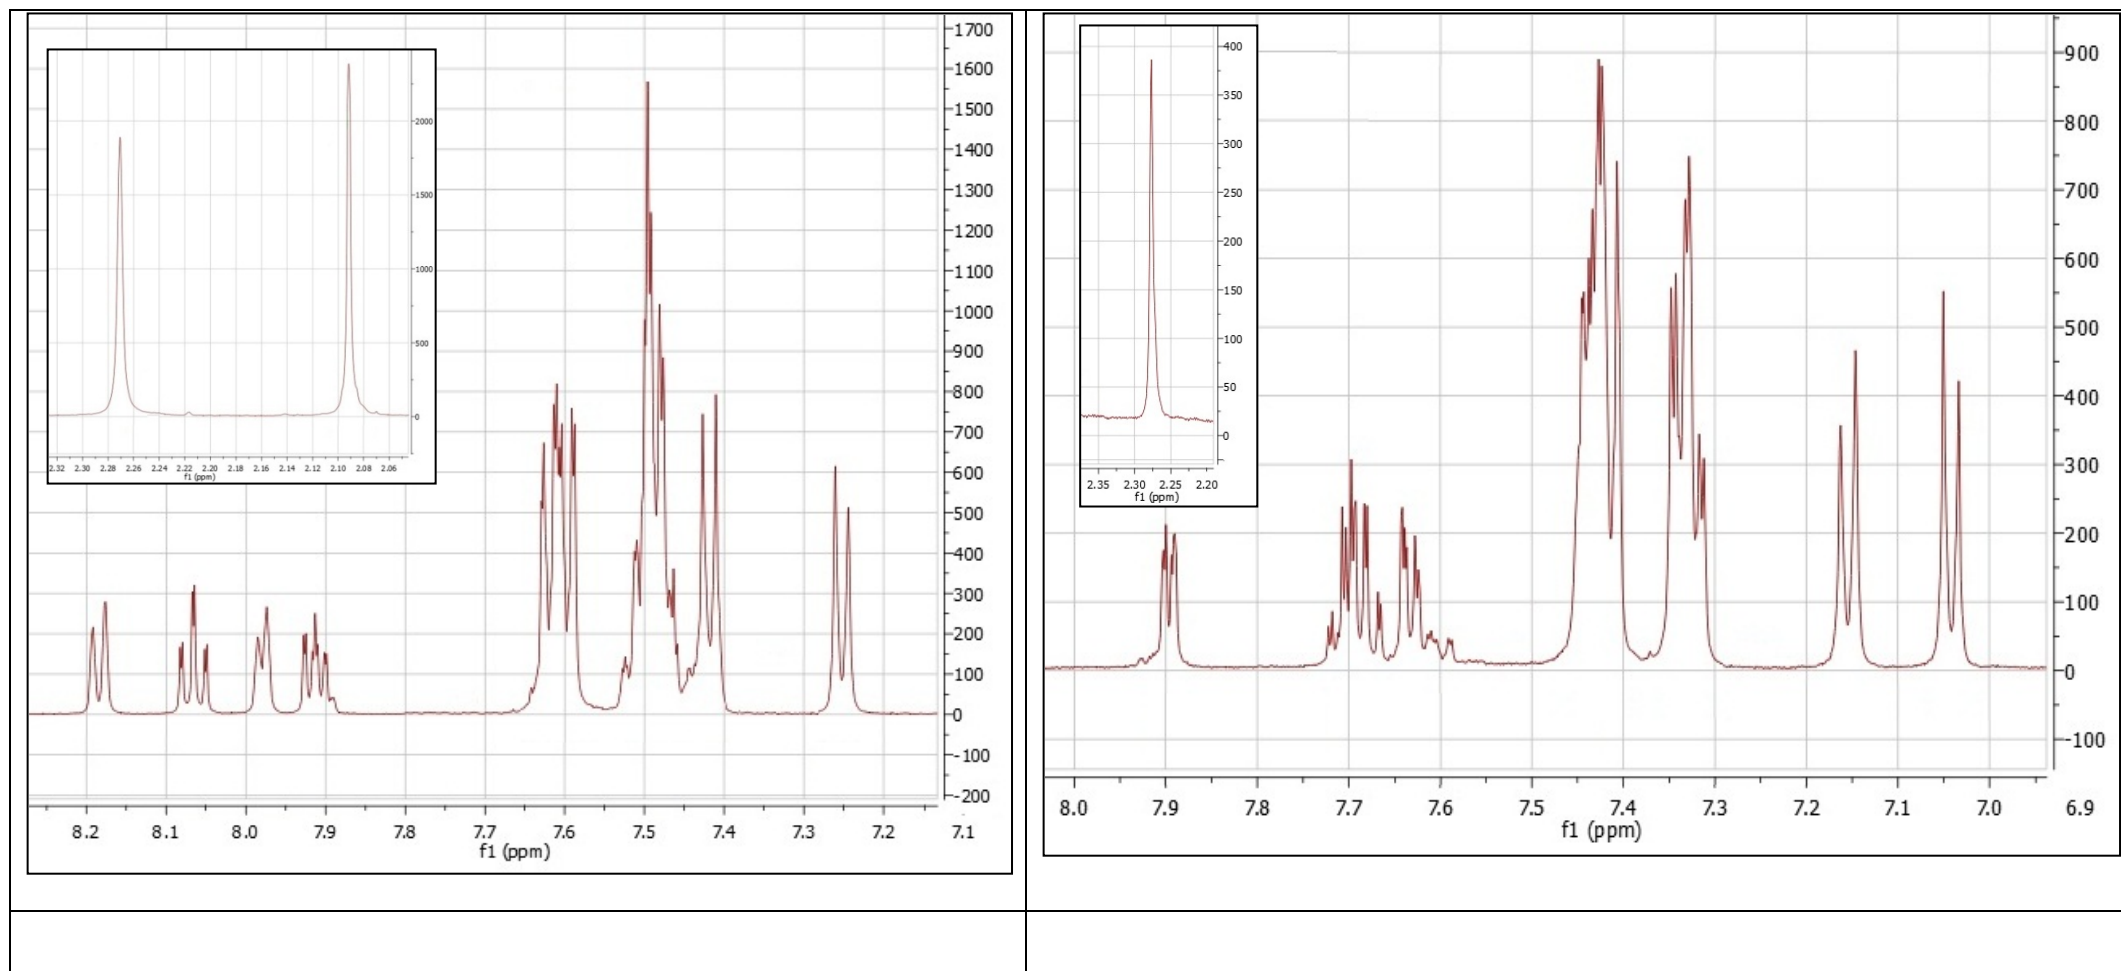

**Figure S2.**  $^1\text{H}$  NMR spectra of **1a** and **3**

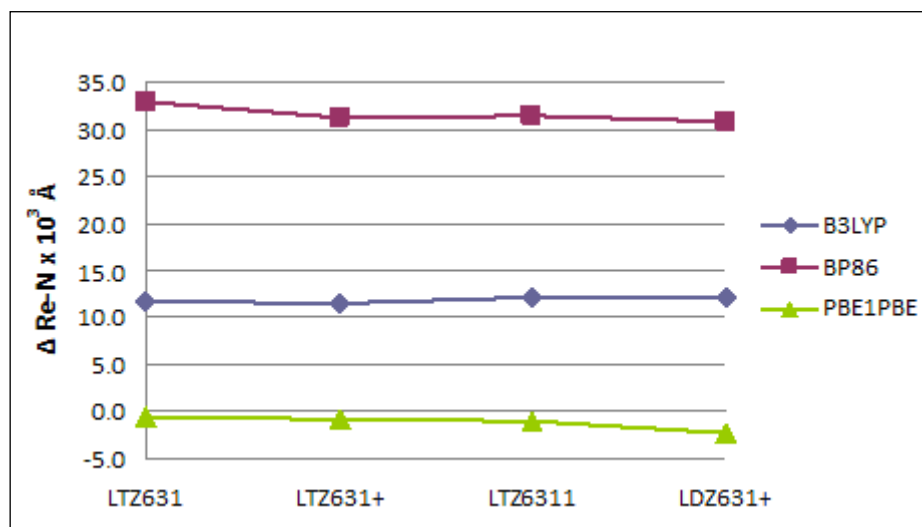

a)

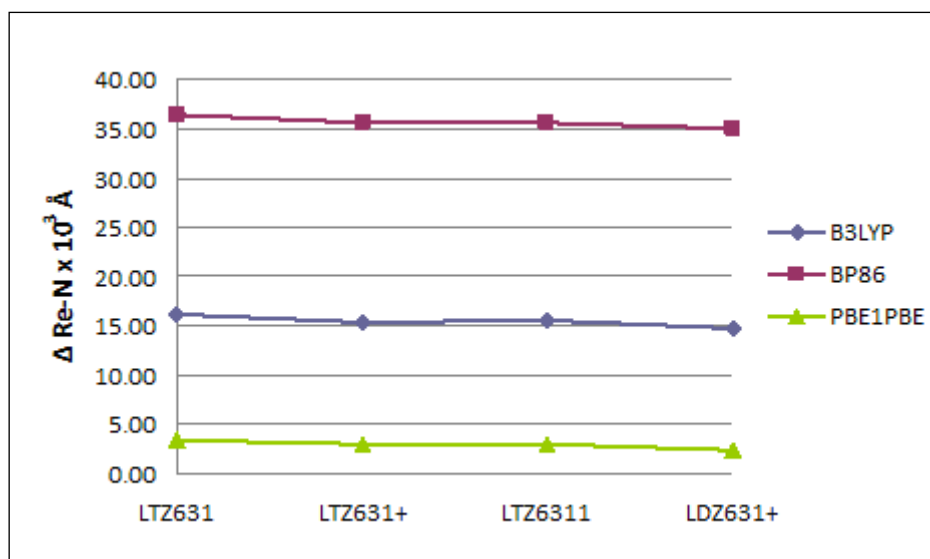

b)

**Figure S3.** Difference in the bond distance  $\text{Re-N}_{\text{imido}}$  between calculated values and the crystallographic results obtained by employing B3LYP, BP86, PBE1PBE method for *trans*-(Cl,Cl)-[Re(*p*-NC<sub>6</sub>H<sub>4</sub>CH<sub>3</sub>)Cl<sub>2</sub>(py-2-COO)(PPh<sub>3</sub>)] (a) and *cis*-(Cl,Cl)-[Re(*p*-NC<sub>6</sub>H<sub>4</sub>CH<sub>3</sub>)Cl<sub>2</sub>(py-2-COO)(PPh<sub>3</sub>)] (b).

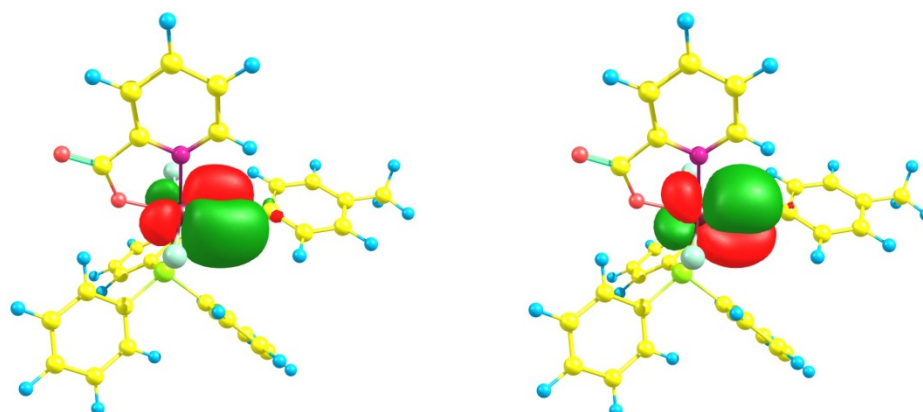

$$0.609 (d)_{\text{Re}} + 0.793 (p)_{\text{N}}$$

$$0.657 (d)_{\text{Re}} + 0.753 (p)_{\text{N}}$$

a)

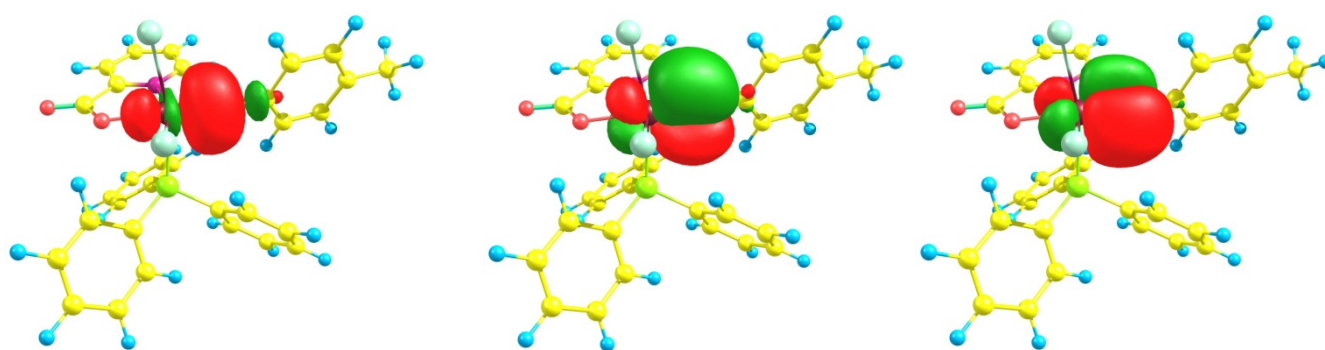

$$0.528 (sp^{0.48}d^{3.39})_{\text{Re}} + 0.849(sp^{0.70})_{\text{N}}$$

$$0.617 (d)_{\text{Re}} + 0.787 (p)_{\text{N}}$$

$$0.635 (d)_{\text{Re}} + 0.772 (p)_{\text{N}}$$

b)

**Figure S4.** The contours of natural bond orbitals (NBOs) between the rhenium and the *p*-tolylimido ligand for **1** (a) and **3** (b).
